# Supplementary material
Source: publisher site journal article supplement (https://www.dovepress.com/article/supplementary_file/608599/20260623%20Supplementary%20Material.docx)
Supplement: Supplementary file 1 [file 20260623%20Supplementary%20Material.docx]

**Supplementary Material**

**Search Strategy**

((("Ischemic Stroke"[Mesh]) OR ((((((((((((((((Ischemic Stroke[Title/Abstract]) OR (Ischemic Strokes[Title/Abstract])) OR (Stroke, Ischemic[Title/Abstract])) OR (Ischaemic Stroke[Title/Abstract])) OR (Ischaemic Strokes[Title/Abstract])) OR (Stroke, Ischaemic[Title/Abstract])) OR (Acute Ischemic Stroke[Title/Abstract])) OR (Acute Ischemic Strokes[Title/Abstract])) OR (Ischemic Stroke, Acute[Title/Abstract])) OR (Stroke, Acute Ischemic[Title/Abstract])) OR (Cryptogenic Ischemic Stroke[Title/Abstract])) OR (Cryptogenic Ischemic Strokes[Title/Abstract])) OR (Ischemic Stroke, Cryptogenic[Title/Abstract])) OR (Stroke, Cryptogenic Ischemic[Title/Abstract])) OR (Cryptogenic Embolism Stroke[Title/Abstract])) OR (Cryptogenic Embolism Strokes[Title/Abstract]))) AND (("Cognitive Dysfunction"[Mesh]) OR ((((((((((((((((((((((((((Cognitive Dysfunction[Title/Abstract]) OR (Cognitive Dysfunctions[Title/Abstract])) OR (Dysfunction, Cognitive[Title/Abstract])) OR (Dysfunctions, Cognitive[Title/Abstract])) OR (Cognitive Disorder[Title/Abstract])) OR (Cognitive Disorders[Title/Abstract])) OR (Disorder, Cognitive[Title/Abstract])) OR (Disorders, Cognitive[Title/Abstract])) OR (Cognitive Impairments[Title/Abstract])) OR (Cognitive Impairment[Title/Abstract])) OR (Impairment, Cognitive[Title/Abstract])) OR (Impairments, Cognitive[Title/Abstract])) OR (Mild Cognitive Impairment[Title/Abstract])) OR (Cognitive Impairment, Mild[Title/Abstract])) OR (Cognitive Impairments, Mild[Title/Abstract])) OR (Impairment, Mild Cognitive[Title/Abstract])) OR (Impairments, Mild Cognitive[Title/Abstract])) OR (Mild Cognitive Impairments[Title/Abstract])) OR (Cognitive Decline[Title/Abstract])) OR (Cognitive Declines[Title/Abstract])) OR (Decline, Cognitive[Title/Abstract])) OR (Declines, Cognitive[Title/Abstract])) OR (Mental Deterioration[Title/Abstract])) OR (Deterioration, Mental[Title/Abstract])) OR (Deteriorations, Mental[Title/Abstract])) OR (Mental Deteriorations[Title/Abstract])))) AND (("Risk Factors"[Mesh]) OR (((((((((((((((((((Risk Factors[Title/Abstract]) OR (Factor, Risk[Title/Abstract])) OR (Risk Factor[Title/Abstract])) OR (Population at Risk[Title/Abstract])) OR (Populations at Risk[Title/Abstract])) OR (Risk Scores[Title/Abstract])) OR (Risk Score[Title/Abstract])) OR (Score, Risk[Title/Abstract])) OR (Risk Factor Scores[Title/Abstract])) OR (Risk Factor Score[Title/Abstract])) OR (Score, Risk Factor[Title/Abstract])) OR (Health Correlates[Title/Abstract])) OR (Correlates, Health[Title/Abstract])) OR (Social Risk Factors[Title/Abstract])) OR (Factor, Social Risk[Title/Abstract])) OR (Factors, Social Risk[Title/Abstract])) OR (Risk Factor, Social[Title/Abstract])) OR (Risk Factors, Social[Title/Abstract])) OR (Social Risk Factor[Title/Abstract])))

**Table S1** Meta regression

| Age>75 | | | | |
| --- | --- | --- | --- | --- |
| Variable | Coefficient | Standard Error | *P* | [95% Confidence Interval] |
| Year | -0.005 | 0.003 | 0.122 | [-0.121, 0.002] |
| Country | 0.034 | 0.047 | 0.481 | [-0.068, 0.136] |
| Study design | 0.062 | 0.072 | 0.406 | [-0.095, 0.219] |
| Diagnosis of Cognitive impairment | 0.181 | 0.369 | 0.001 | [0.101, 0.261] |
| Regression model | 0.052 | 0.075 | 0.497 | [-0.111, 0.216] |
| low educational level | | | | |
| Year | 0.004 | 0.029 | 0.885 | [-0.066, 0.752] |
| Country | 0.131 | 0.201 | 0.538 | [-0.361, 0.624] |
| Diagnosis of Cognitive impairment | -0.226 | 0.244 | 0.391 | [-0.824, 0.372] |
| Regression model | 0.230 | 0.244 | 0.382 | [-0.366, 0.826] |


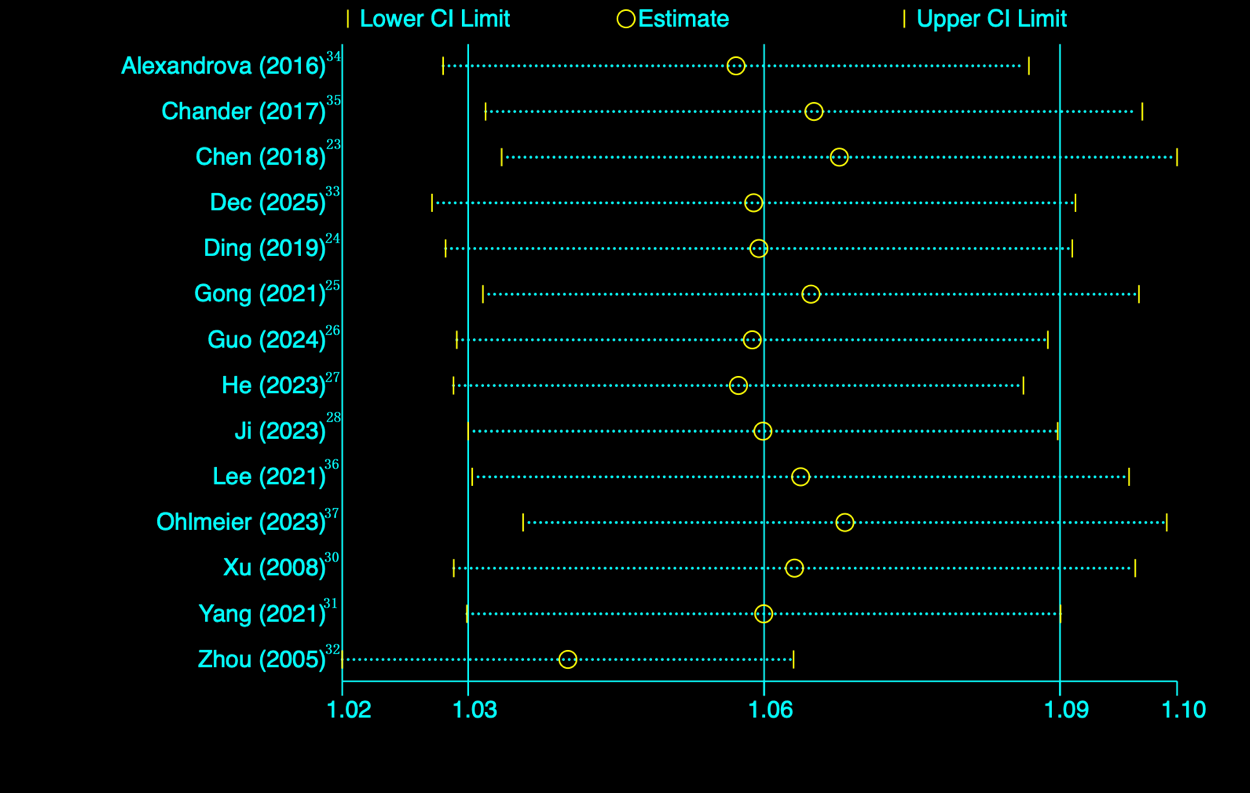


**Figure S1** Age>75 sensitivity analysis

Abbreviations: CI, confidence interval.


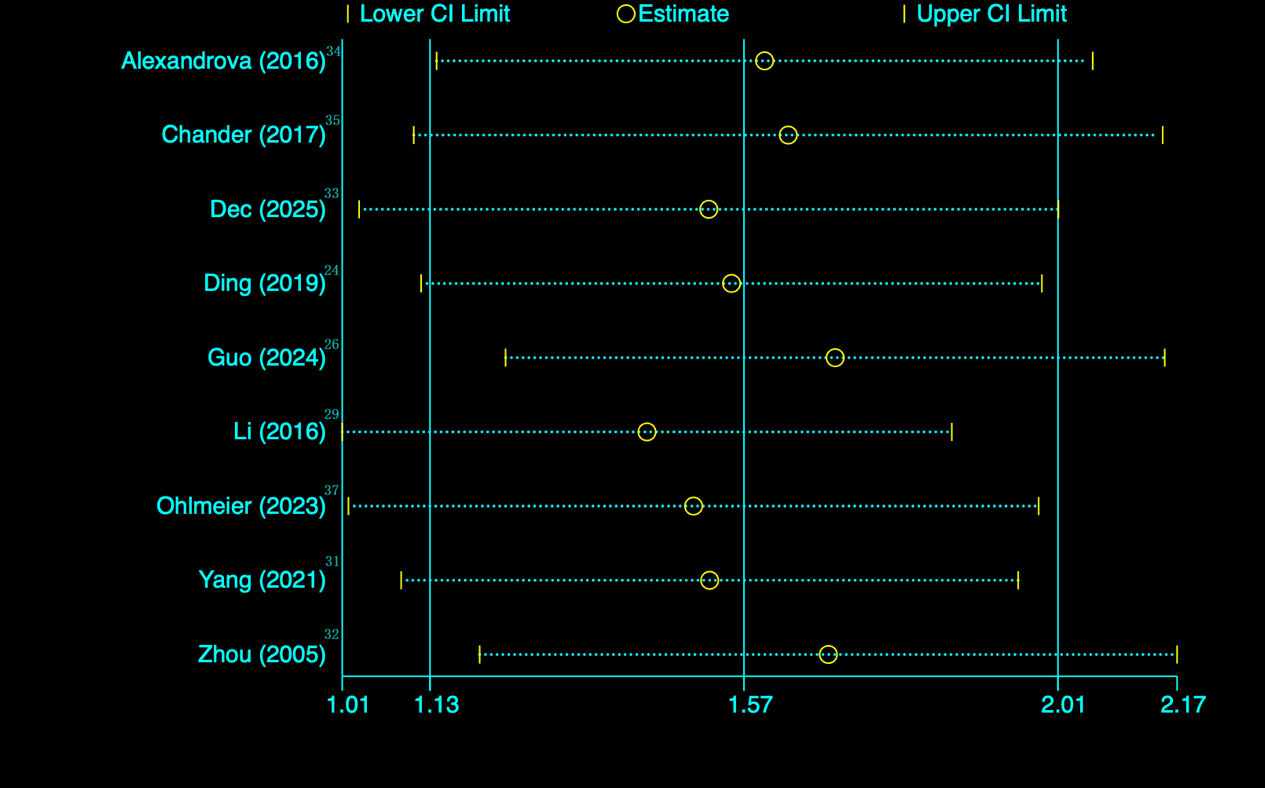


**Figure S2** history of diabetes sensitivity analysis

Abbreviations: CI, confidence interval.


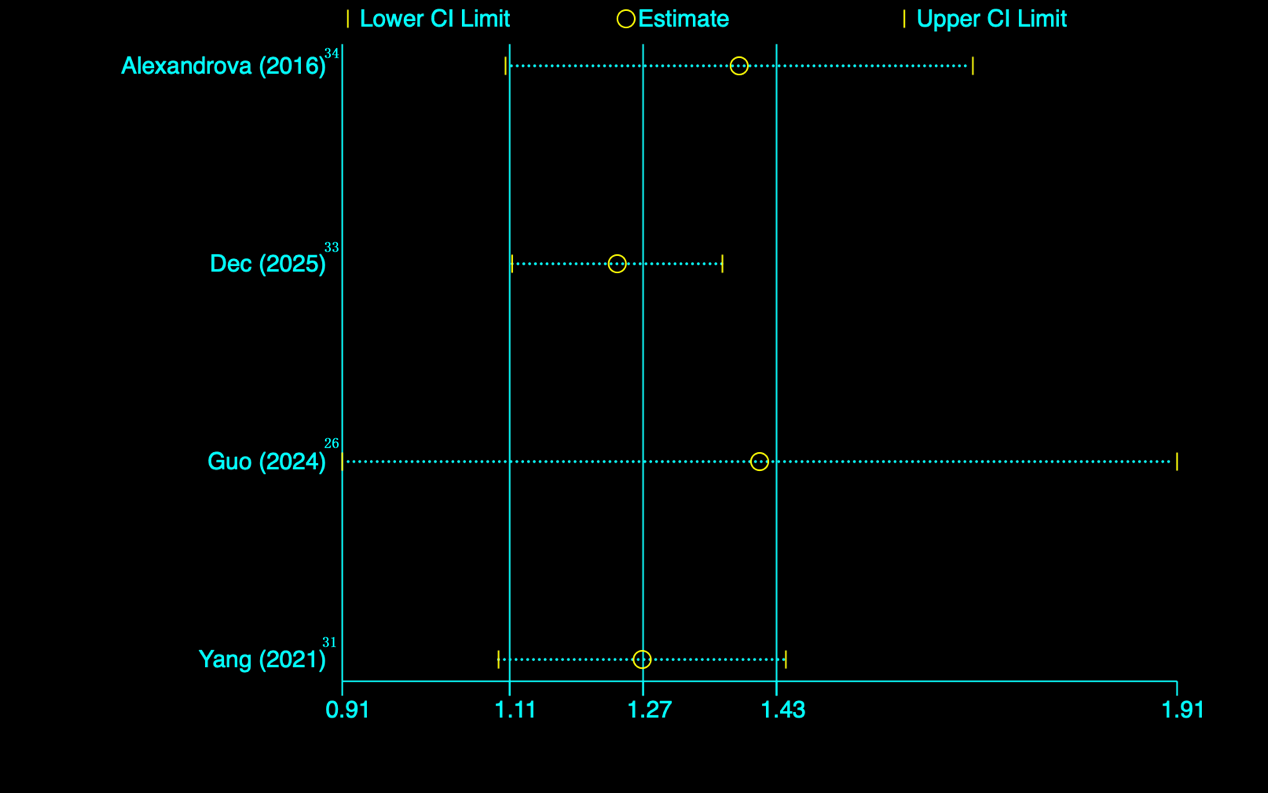


**Figure S3** C-reactive protein sensitivity analysis

Abbreviations: CI, confidence interval.


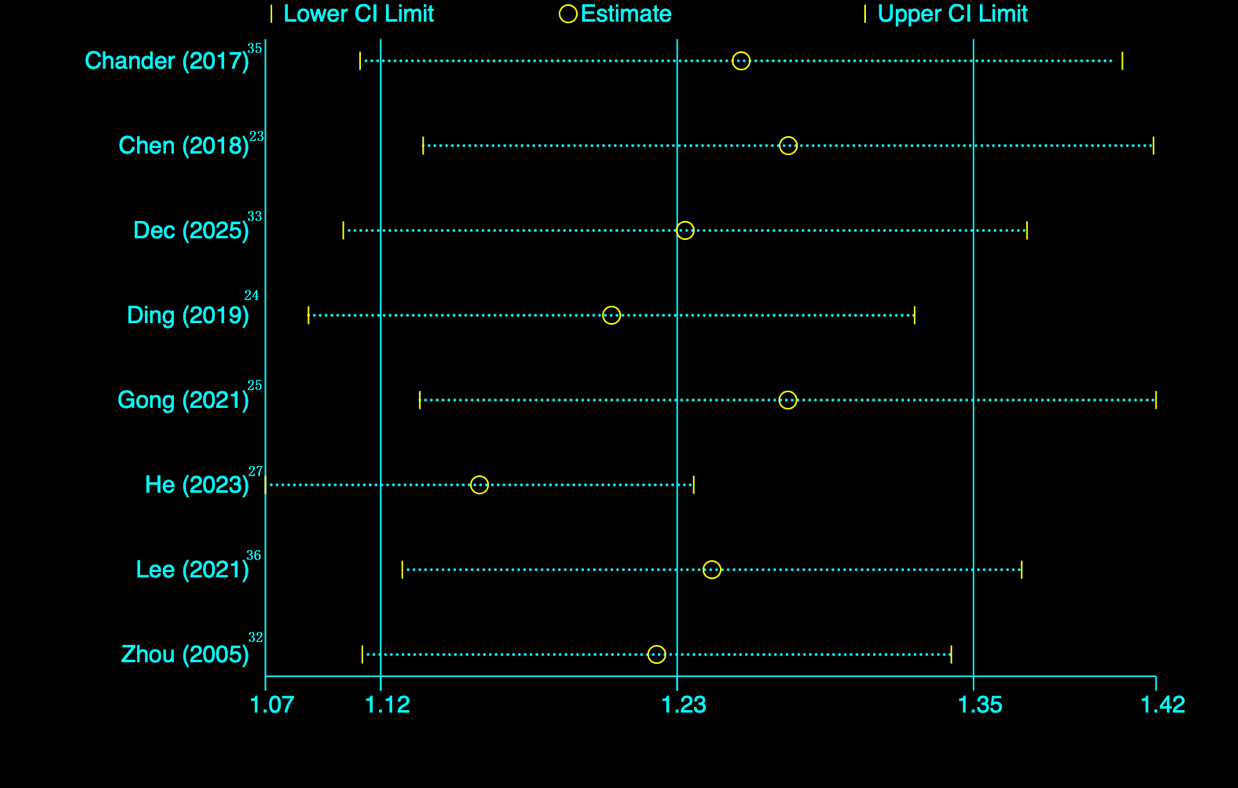


**Figure S4** low educational level sensitivity analysis

Abbreviations: CI, confidence interval.


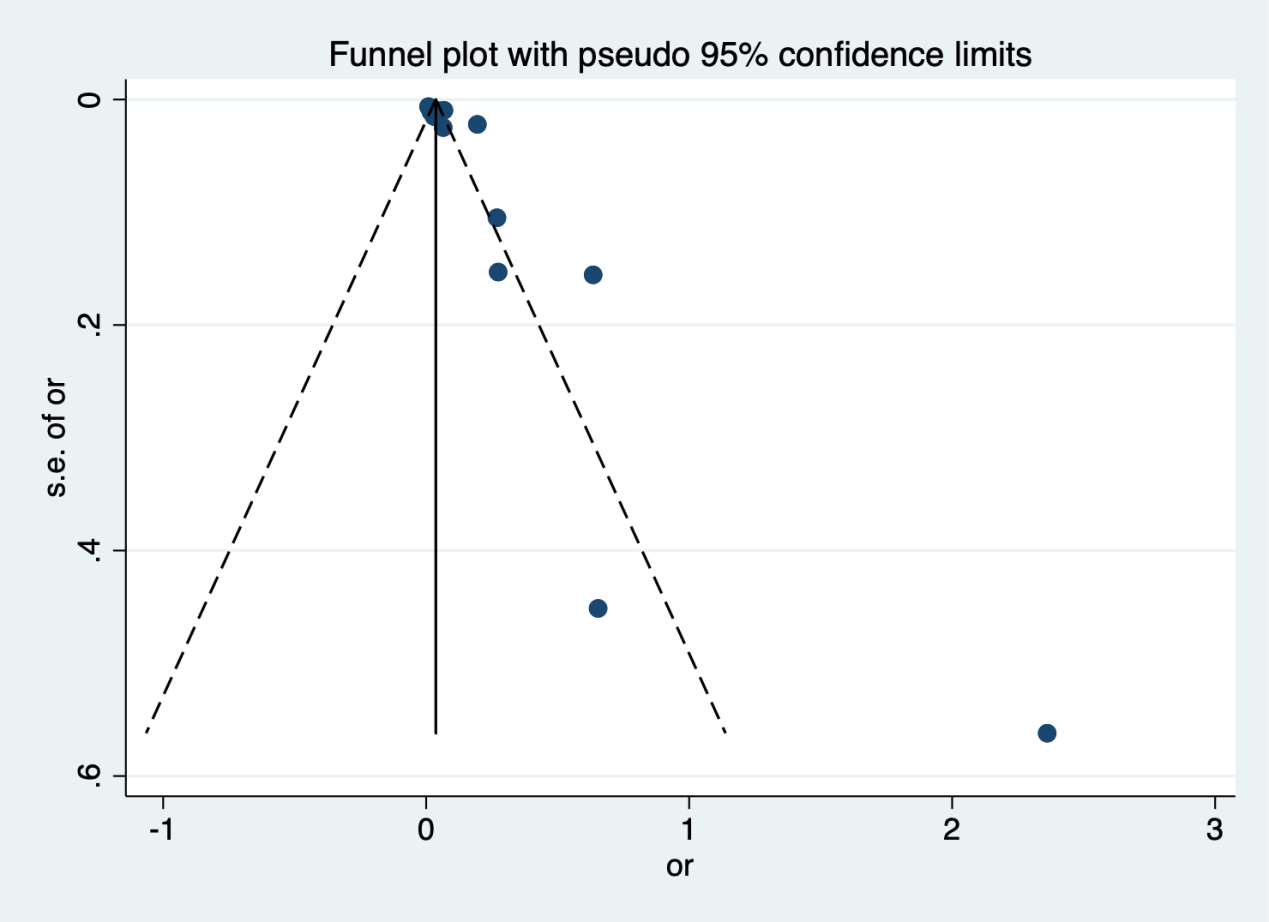


**Figure S5** Meta-analysis funnel plot of age>75

Abbreviations: s.e., standard error; or, odds ratio.


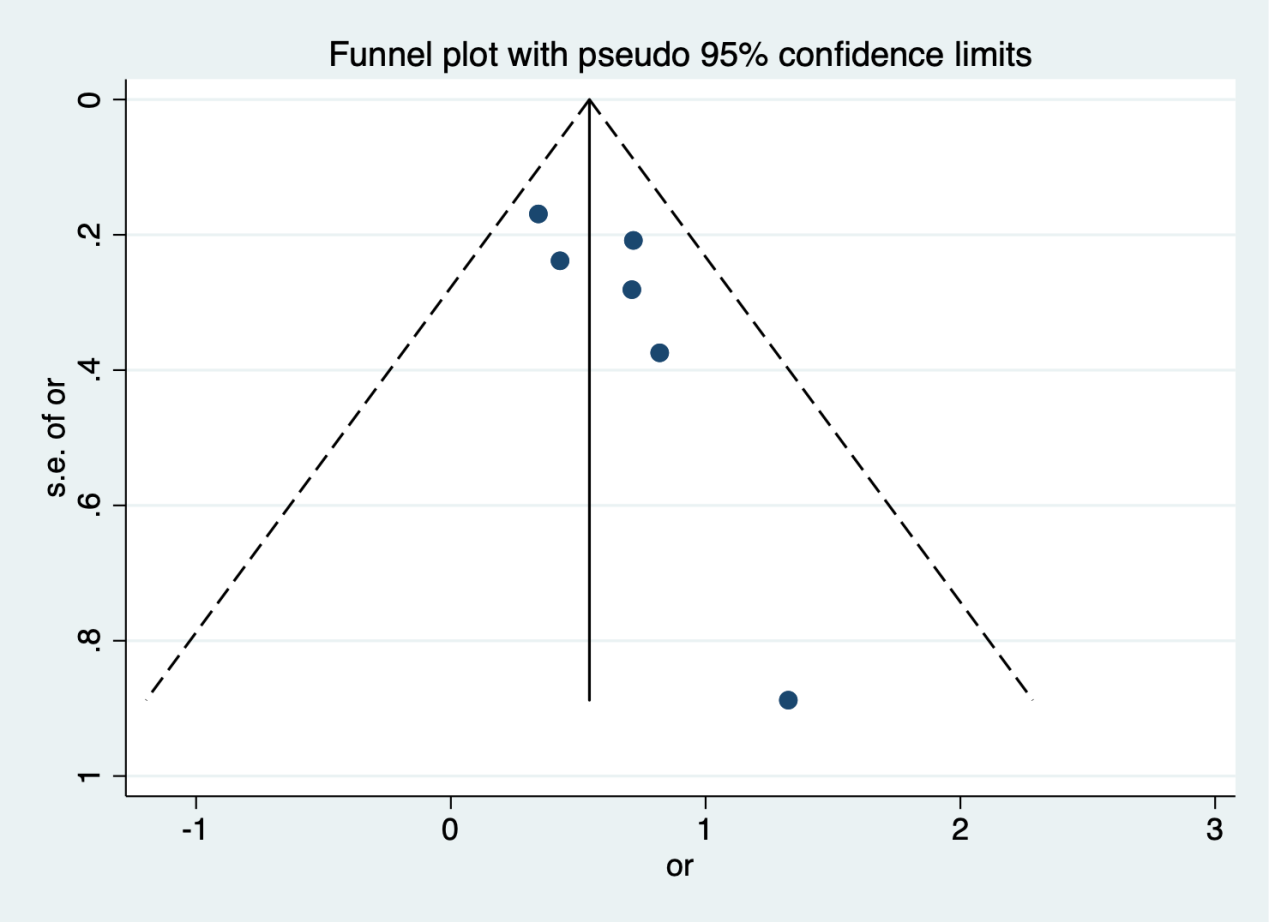


**Figure S6** Meta-analysis funnel plot of female

Abbreviations: s.e., standard error; or, odds ratio.


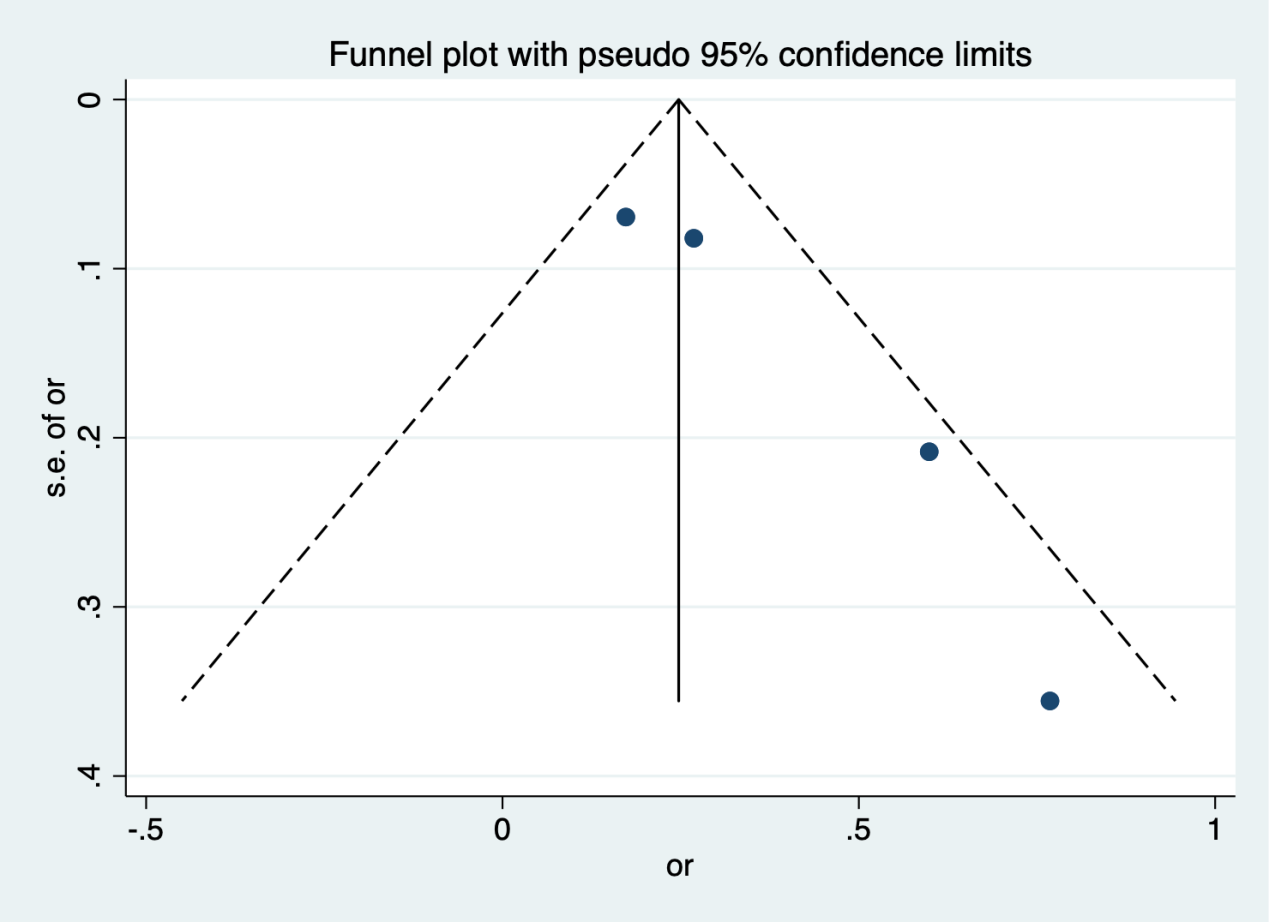


**Figure S7** Meta-analysis funnel plot of high C-reactive protein

Abbreviations: s.e., standard error; or, odds ratio.


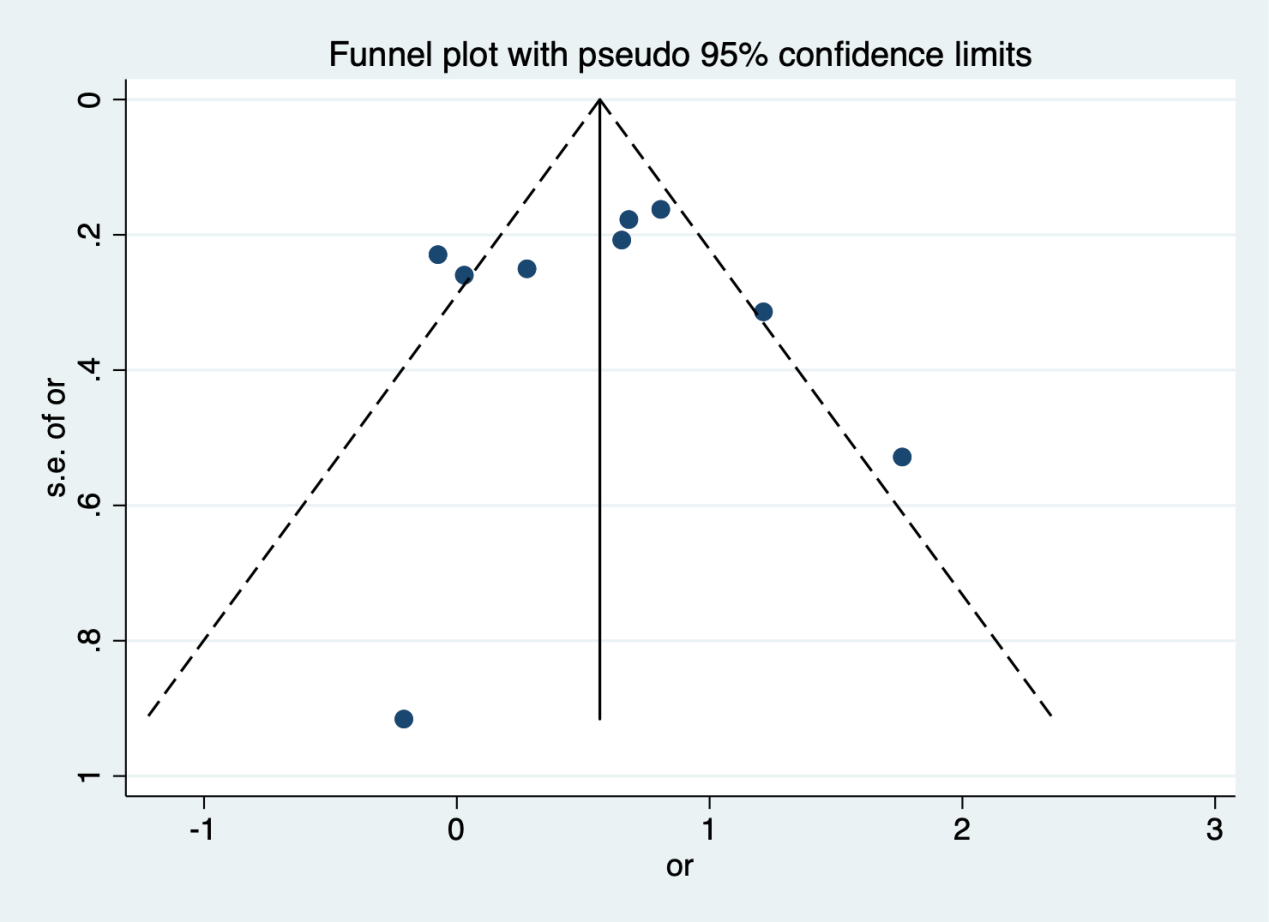


**Figure S8** Meta-analysis funnel plot of history of diabetes

Abbreviations: s.e., standard error; or, odds ratio.


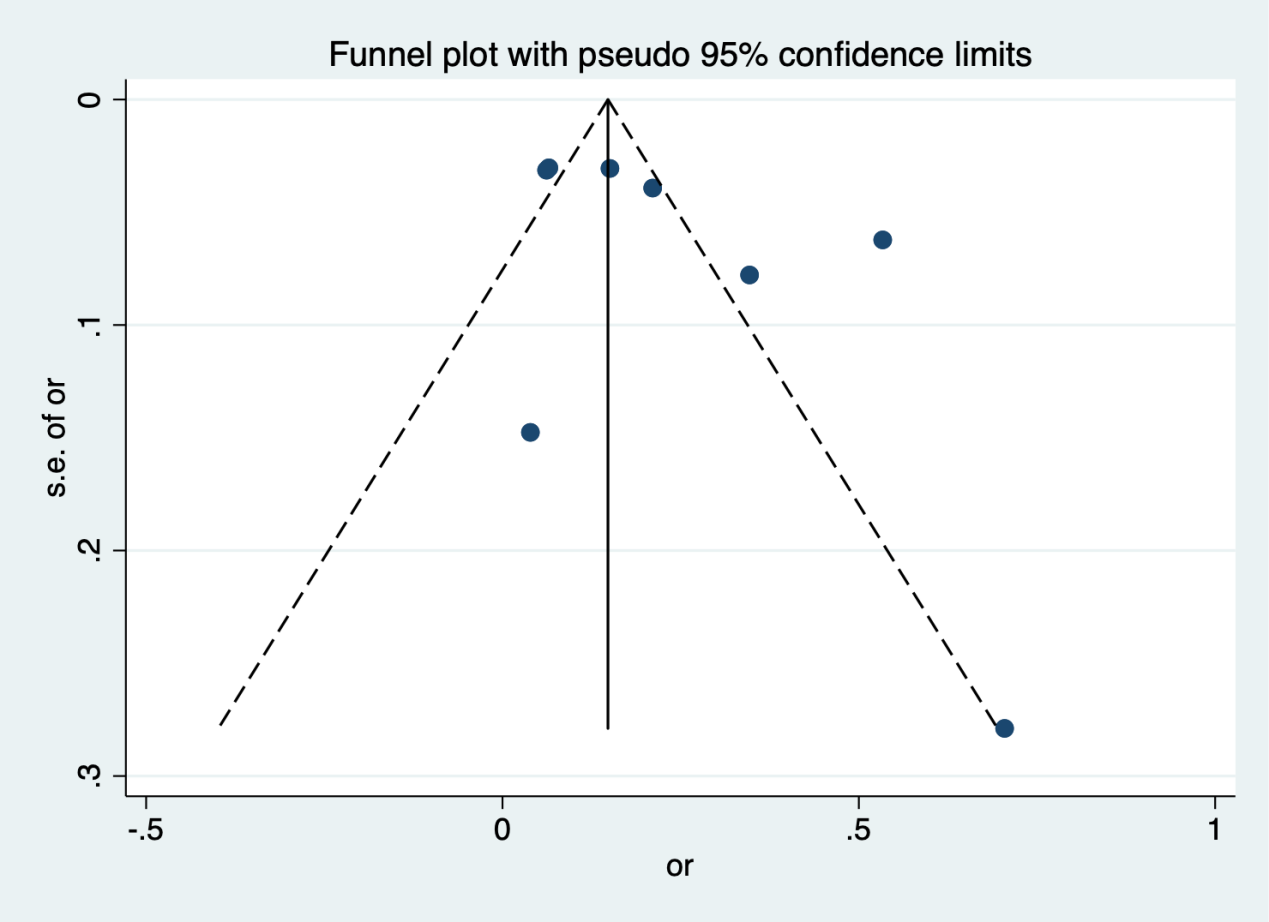


**Figure S9** Meta-analysis funnel plot of low educational level

Abbreviations: s.e., standard error; or, odds ratio.


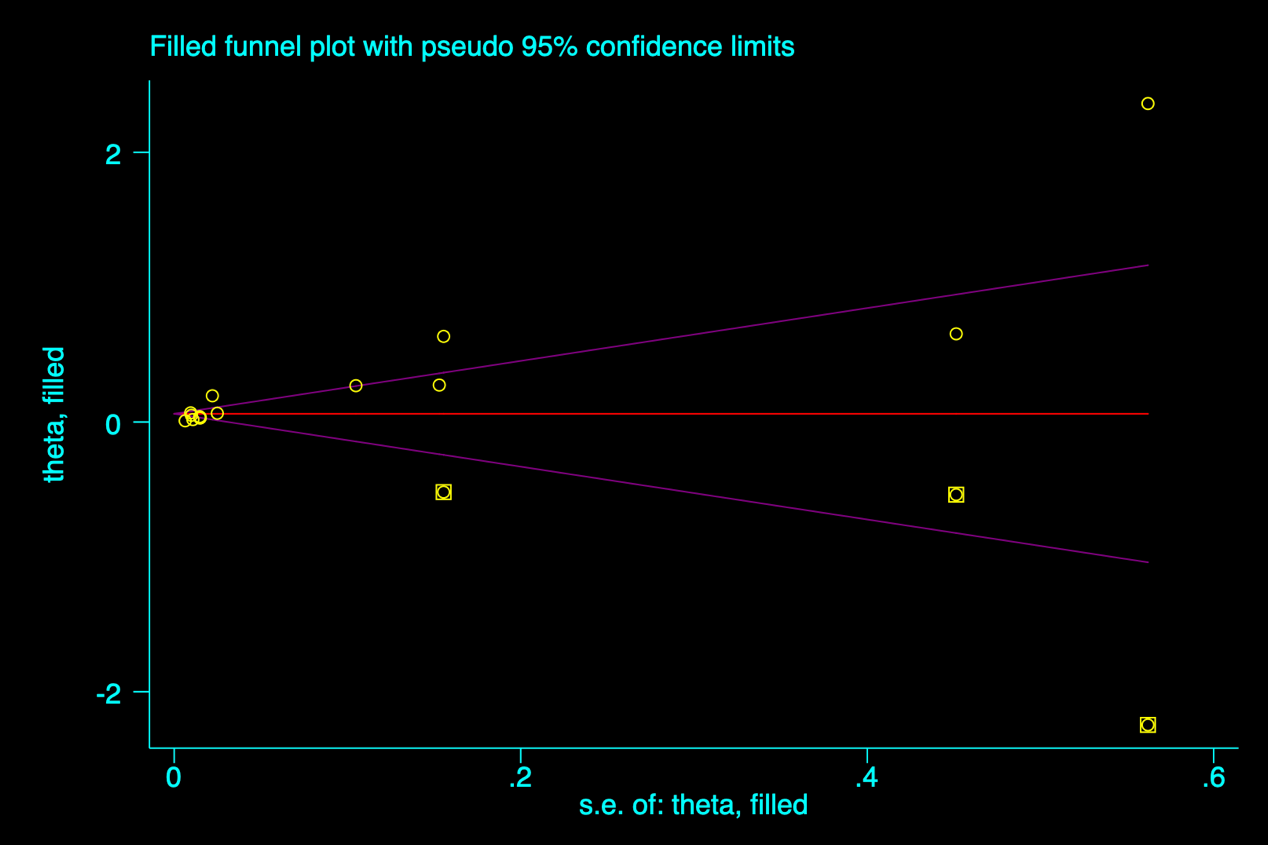


**Figure S10** The trim and fill funnel plot of age>75

Abbreviations: s.e., standard error.


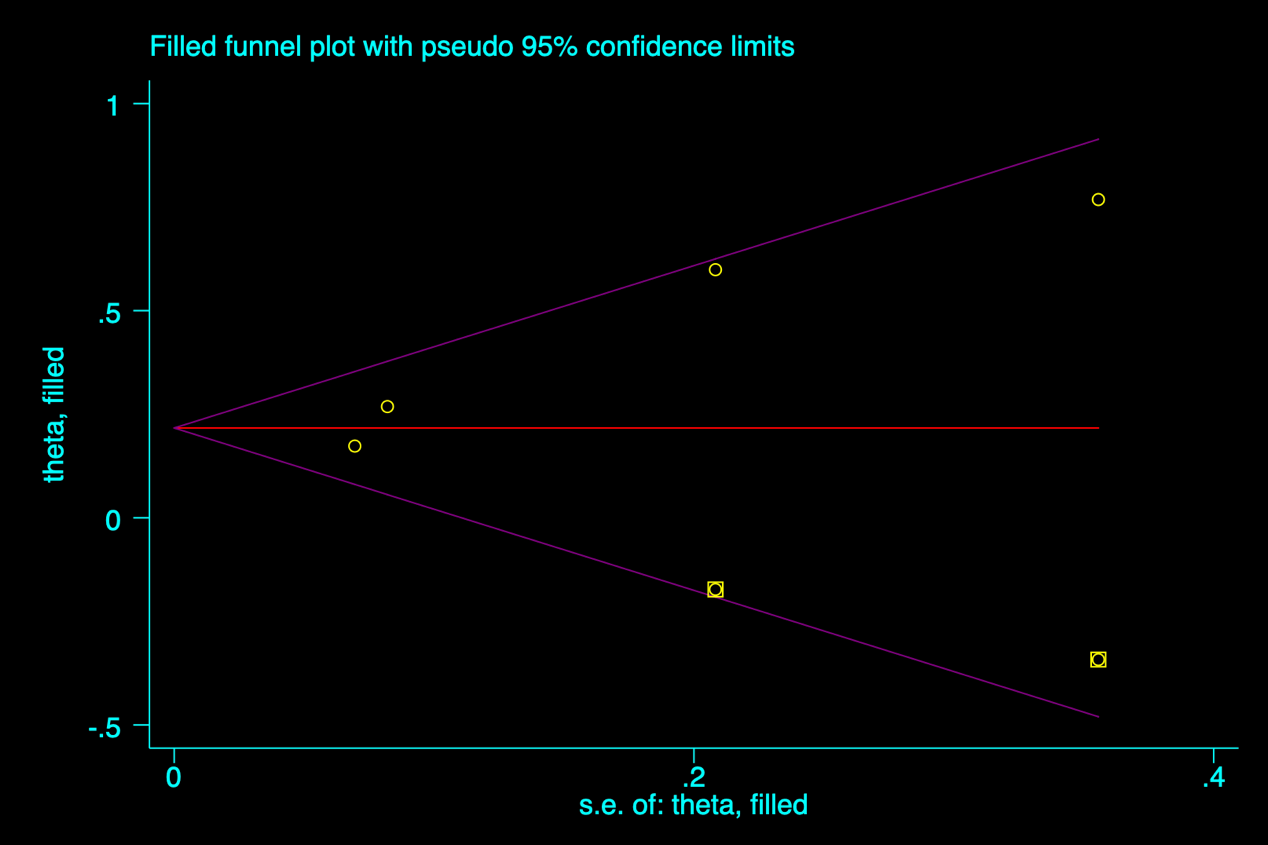


**Figure S11** The trim and fill funnel plot of high C-reactive protein

Abbreviations: s.e., standard error.
